# Supplementary material for: Influence of Atmospheric Circulation on the Interannual Variability of Transport from Global and Regional Emissions into the Arctic
Source: Copernicus journal article supplement (doi:10.5194/egusphere-2024-253), 2024-02-16
Supplement: Supplementary file 1 [file egusphere-2024-253-supplement.pdf]

**Supplementary material for “Influence of Atmospheric Circulation on the Interannual Variability of Transport from Global and Regional Emissions into the Arctic” by Zheng et al.,**

**Content:**

Table S1-S4

Figure S1-S11

| DJF Correlation                     | Global (GLB) | East Asia (EA) | Europe (EUR) | North America (NAM) | Tibetan Plateau & South Asia (TPSA) | Middle East (ME) | Central Asia & Siberia (CAS) | Southeast Asia (SEA) | Africa (AFR) | South America (SAM) | Remaining regions (REM) |
|-------------------------------------|--------------|----------------|--------------|---------------------|-------------------------------------|------------------|------------------------------|----------------------|--------------|---------------------|-------------------------|
| Global (GLB)                        | —            | <b>0.51</b>    | 0.26         | <b>0.45</b>         | <b>0.58</b>                         | <b>0.42</b>      | 0.09                         | 0.26                 | 0.24         | -0.06               | 0.01                    |
| East Asia (EA)                      | —            | —              | <b>-0.56</b> | 0.08                | <b>0.33</b>                         | <b>0.47</b>      | -0.20                        | <b>0.57</b>          | 0.27         | 0.06                | 0.18                    |
| Europe (EUR)                        | —            | —              | —            | 0.08                | -0.09                               | -0.22            | <b>0.34</b>                  | -0.27                | -0.07        | -0.23               | <b>-0.31</b>            |
| North America (NAM)                 | —            | —              | —            | —                   | -0.08                               | -0.11            | -0.12                        | -0.10                | -0.03        | -0.09               | 0.05                    |
| Tibetan Plateau & South Asia (TPSA) | —            | —              | —            | —                   | —                                   | 0.26             | -0.12                        | 0.11                 | 0.26         | 0.18                | 0.18                    |
| Middle East (ME)                    | —            | —              | —            | —                   | —                                   | —                | 0.09                         | 0.26                 | 0.07         | 0.02                | 0.00                    |
| Central Asia & Siberia (CAS)        | —            | —              | —            | —                   | —                                   | —                | —                            | -0.02                | <b>-0.41</b> | -0.25               | -0.21                   |
| Southeast Asia (SEA)                | —            | —              | —            | —                   | —                                   | —                | —                            | —                    | <b>0.32</b>  | 0.01                | 0.10                    |
| Africa (AFR)                        | —            | —              | —            | —                   | —                                   | —                | —                            | —                    | —            | 0.29                | 0.27                    |
| South America (SAM)                 | —            | —              | —            | —                   | —                                   | —                | —                            | —                    | —            | —                   | <b>0.59</b>             |
| Remaining regions (REM)             | —            | —              | —            | —                   | —                                   | —                | —                            | —                    | —            | —                   | —                       |

**Table S1: Summary of correlation of Arctic tracer mass between different tracers. The bold values indicate that the correlation is statistically significant at 95%.**

| JJA CO50                            | EOF1 spatial (grid-point) variance explained | EOF1 (horizontally and vertically integrated) Arctic tracer mass variance explained | Correlation: EOF1 vs Arctic tracer mass |
|-------------------------------------|----------------------------------------------|-------------------------------------------------------------------------------------|-----------------------------------------|
| East Asia (EA)                      | 51.6%                                        | 97.4%                                                                               | 0.987                                   |
| Europe (EUR)                        | 61.5%                                        | 97.3%                                                                               | 0.987                                   |
| North America (NAM)                 | 44.9%                                        | 98.9%                                                                               | 0.994                                   |
| Tibetan Plateau & South Asia (TPSA) | 43.3%                                        | 98.6%                                                                               | 0.993                                   |
| Middle East (ME)                    | 60.9%                                        | 99.9%                                                                               | 0.999                                   |
| Central Asia & Siberia (CAS)        | 43.3%                                        | 89.2%                                                                               | 0.944                                   |
| Southeast Asia (SEA)                | 71.8%                                        | 98.5%                                                                               | 0.992                                   |
| Africa (AFR)                        | 38.2%                                        | 99.6%                                                                               | 0.998                                   |
| South America (SAM)                 | 50.7%                                        | 97.7%                                                                               | 0.988                                   |
| Remaining regions (REM)             | 62.5%                                        | 98.7%                                                                               | 0.994                                   |

**Table S2: Similar to Table1, but for summer (JJA).**

| JJA Correlation                     | Global (GLB) | East Asia (EA) | Europe (EUR) | North America (NAM) | Tibetan Plateau & South Asia (TPSA) | Middle East (ME) | Central Asia & Siberia (CAS) | Southeast Asia (SEA) | Africa (AFR) | South America (SAM) | Remaining regions (REM) |
|-------------------------------------|--------------|----------------|--------------|---------------------|-------------------------------------|------------------|------------------------------|----------------------|--------------|---------------------|-------------------------|
| Global (GLB)                        | —            | <b>0.48</b>    | <b>0.46</b>  | 0.08                | <b>0.42</b>                         | 0.26             | 0.15                         | <b>0.39</b>          | 0.07         | 0.01                | -0.18                   |
| East Asia (EA)                      | —            | —              | <b>-0.32</b> | -0.19               | 0.11                                | 0.11             | 0.07                         | <b>0.45</b>          | -0.19        | 0.00                | 0.03                    |
| Europe (EUR)                        | —            | —              | —            | <b>-0.30</b>        | 0.13                                | -0.05            | 0.07                         | -0.11                | 0.00         | 0.02                | -0.19                   |
| North America (NAM)                 | —            | —              | —            | —                   | -0.14                               | -0.00            | -0.31                        | -0.22                | 0.11         | -0.07               | -0.15                   |
| Tibetan Plateau & South Asia (TPSA) | —            | —              | —            | —                   | —                                   | 0.17             | 0.27                         | <b>0.46</b>          | 0.09         | -0.11               | -0.06                   |
| Middle East (ME)                    | —            | —              | —            | —                   | —                                   | —                | <b>0.40</b>                  | 0.18                 | 0.31         | 0.03                | -0.13                   |
| Central Asia & Siberia (CAS)        | —            | —              | —            | —                   | —                                   | —                | —                            | 0.11                 | 0.25         | 0.10                | -0.00                   |
| Southeast Asia (SEA)                | —            | —              | —            | —                   | —                                   | —                | —                            | —                    | 0.15         | -0.04               | 0.24                    |
| Africa (AFR)                        | —            | —              | —            | —                   | —                                   | —                | —                            | —                    | —            | <b>0.35</b>         | <b>0.47</b>             |
| South America (SAM)                 | —            | —              | —            | —                   | —                                   | —                | —                            | —                    | —            | —                   | <b>0.70</b>             |
| Remaining regions (REM)             | —            | —              | —            | —                   | —                                   | —                | —                            | —                    | —            | —                   | —                       |

**Table S3: Similar to Table S1, but for summer (JJA).**

| DJF EOF1                            | EOF1 Arctic tracer mass variance explained |       |       |       |       |       |
|-------------------------------------|--------------------------------------------|-------|-------|-------|-------|-------|
|                                     | CO_100                                     | CO_50 | CO_25 | CO_15 | CO_10 | CO_05 |
| East Asia (EA)                      | 99.9%                                      | 99.5% | 98.1% | 96.0% | 94.5% | 93.9% |
| Europe (EUR)                        | 94.6%                                      | 93.6% | 91.3% | 88.1% | 84.6% | 78.5% |
| North America (NAM)                 | 96.3%                                      | 93.2% | 88.5% | 85.0% | 82.3% | 76.7% |
| Tibetan Plateau & South Asia (TPSA) | 99.9%                                      | 99.9% | 99.9% | 99.9% | 99.8% | 97.2% |
| Middle East (ME)                    | 99.9%                                      | 99.9% | 99.9% | 99.9% | 99.8% | 98.0% |
| Central Asia & Siberia (CAS)        | 99.8%                                      | 99.6% | 99.1% | 98.6% | 97.3% | 87.2% |
| Southeast Asia (SEA)                | 99.4%                                      | 98.3% | 95.4% | 92.0% | 89.4% | 87.8% |
| Africa (AFR)                        | 99.9%                                      | 99.9% | 99.8% | 99.4% | 99.0% | 96.7% |
| South America (SAM)                 | 97.5%                                      | 96.7% | 95.3% | 94.0% | 92.7% | 90.9% |
| Remaining regions (REM)             | 99.6%                                      | 99.1% | 99.1% | 98.4% | 87.9% | 86.6% |
| East Asia (EA)                      | 99.4%                                      | 99.3% | 98.0% | 91.4% | 79.0% | 54.8% |

**Table S4: Arctic tracer mass variance explained by regional tracer EOF1 during winter (DJF) with tracer different lifetimes.**

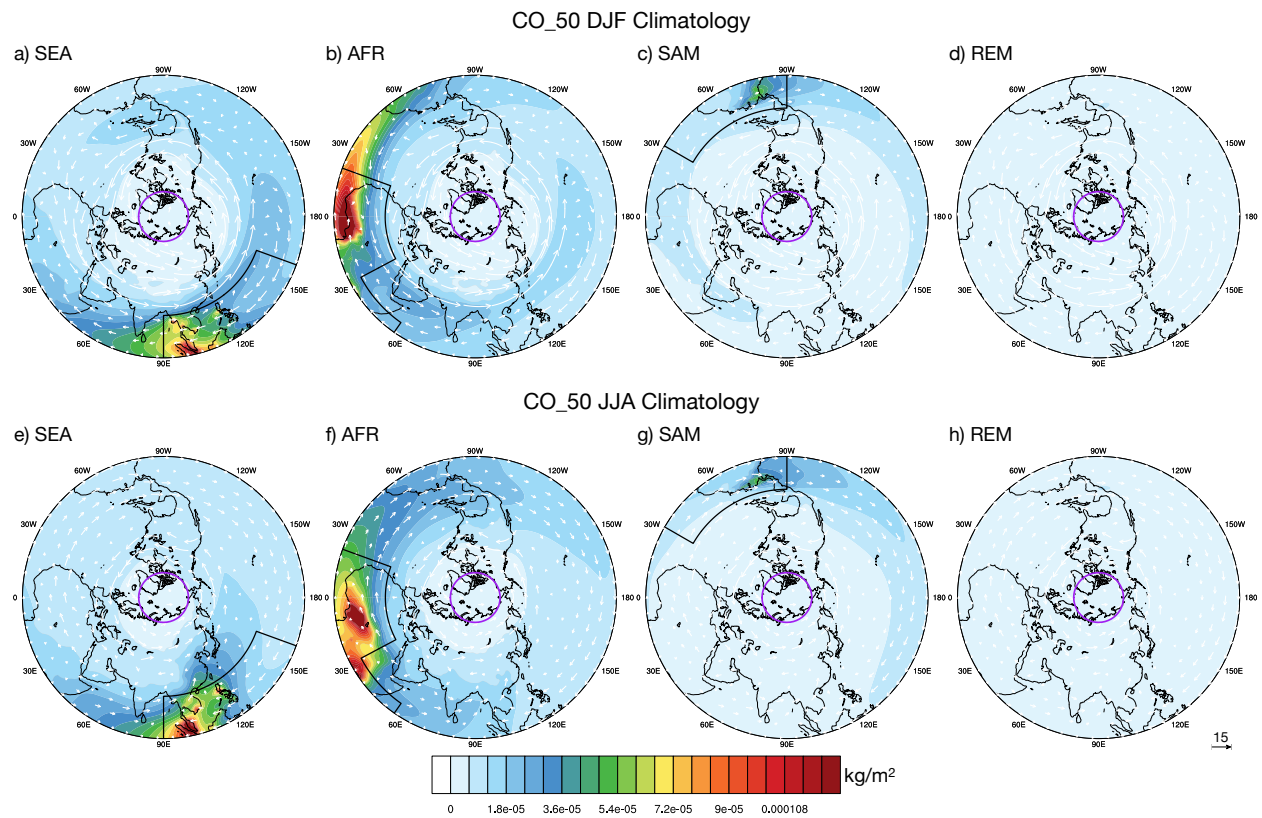

**Figure S1: Similar to Fig. 3, but for the SEA, AFR, SAM an REM tracers.**

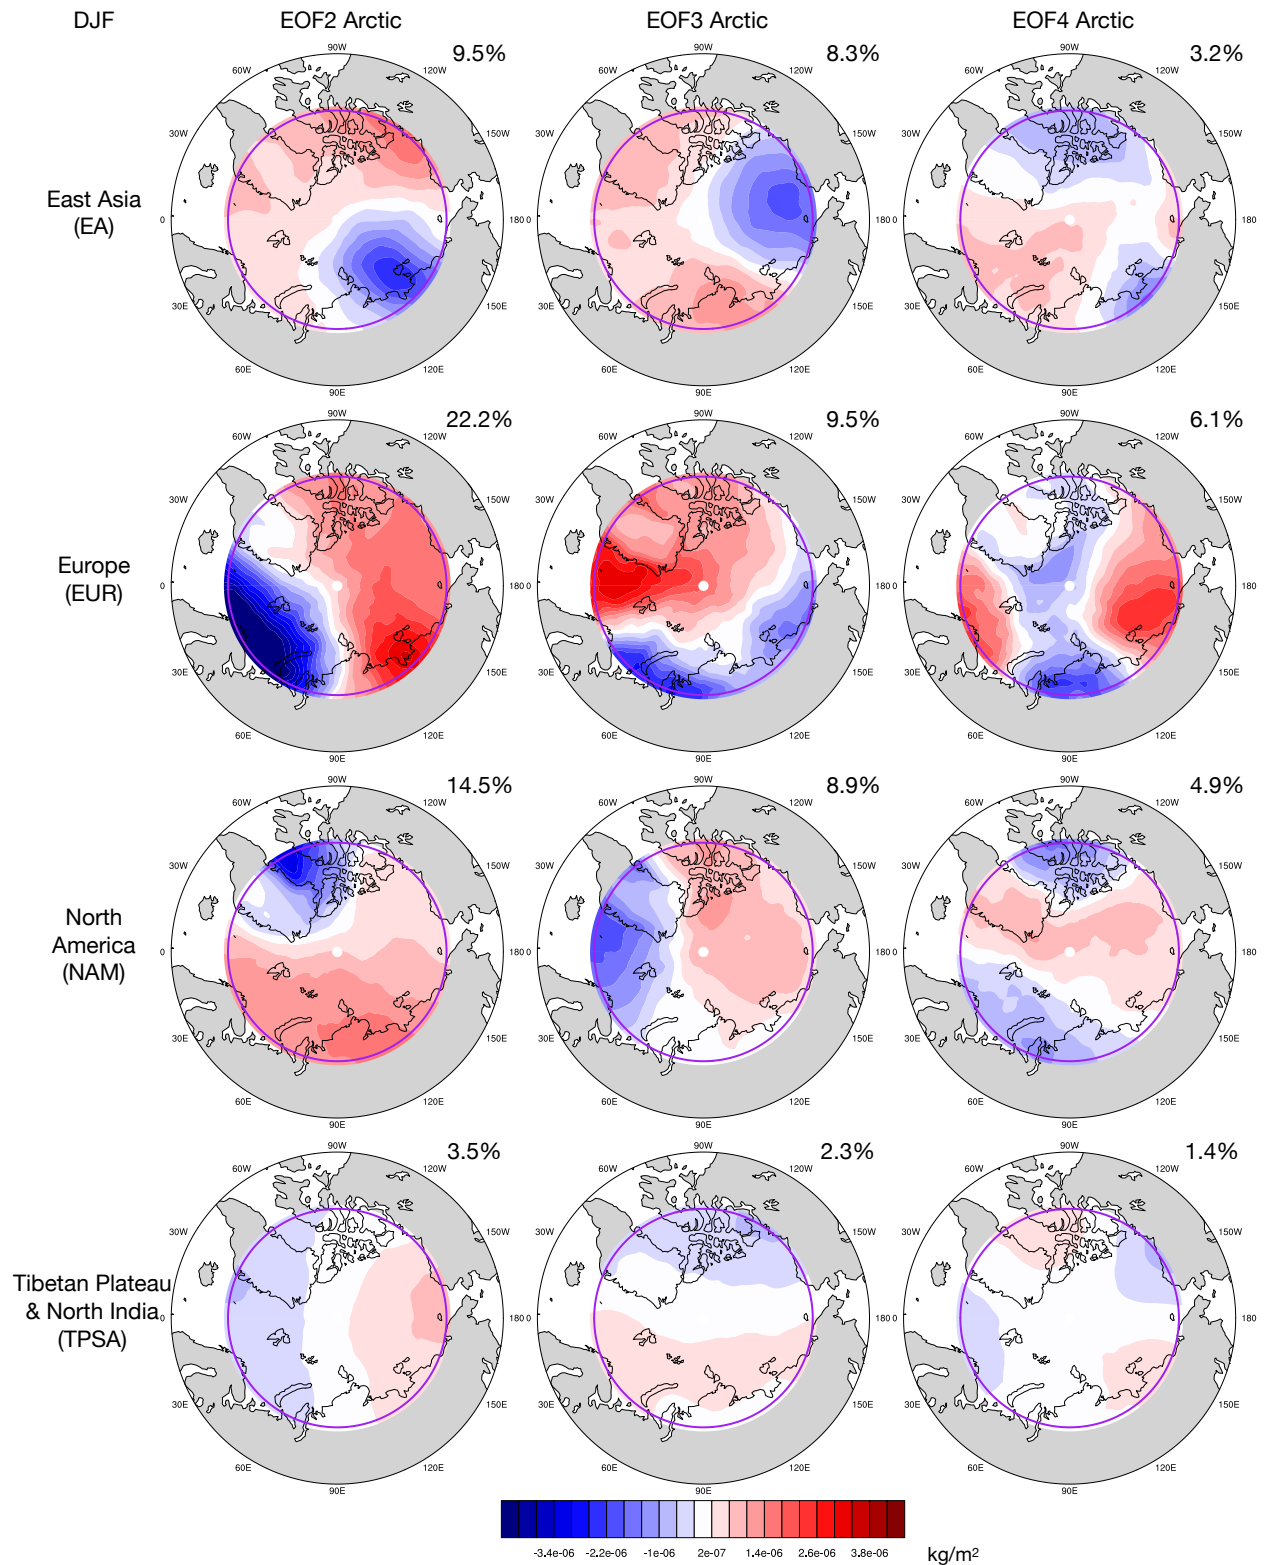

Figure S2: Similar to Fig. 7a-d, but for EOF2, EOF3 and EOF4.

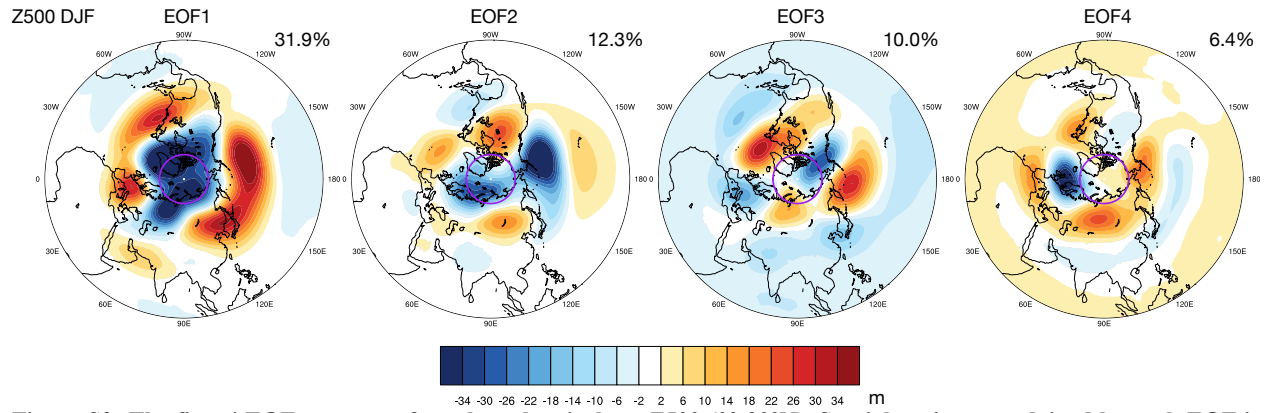

**Figure S3: The first 4 EOF patterns of northern hemisphere Z500 (0°-90°N). Spatial variance explained by each EOF is shown on the top-right corner of each panel. Unit in m.**



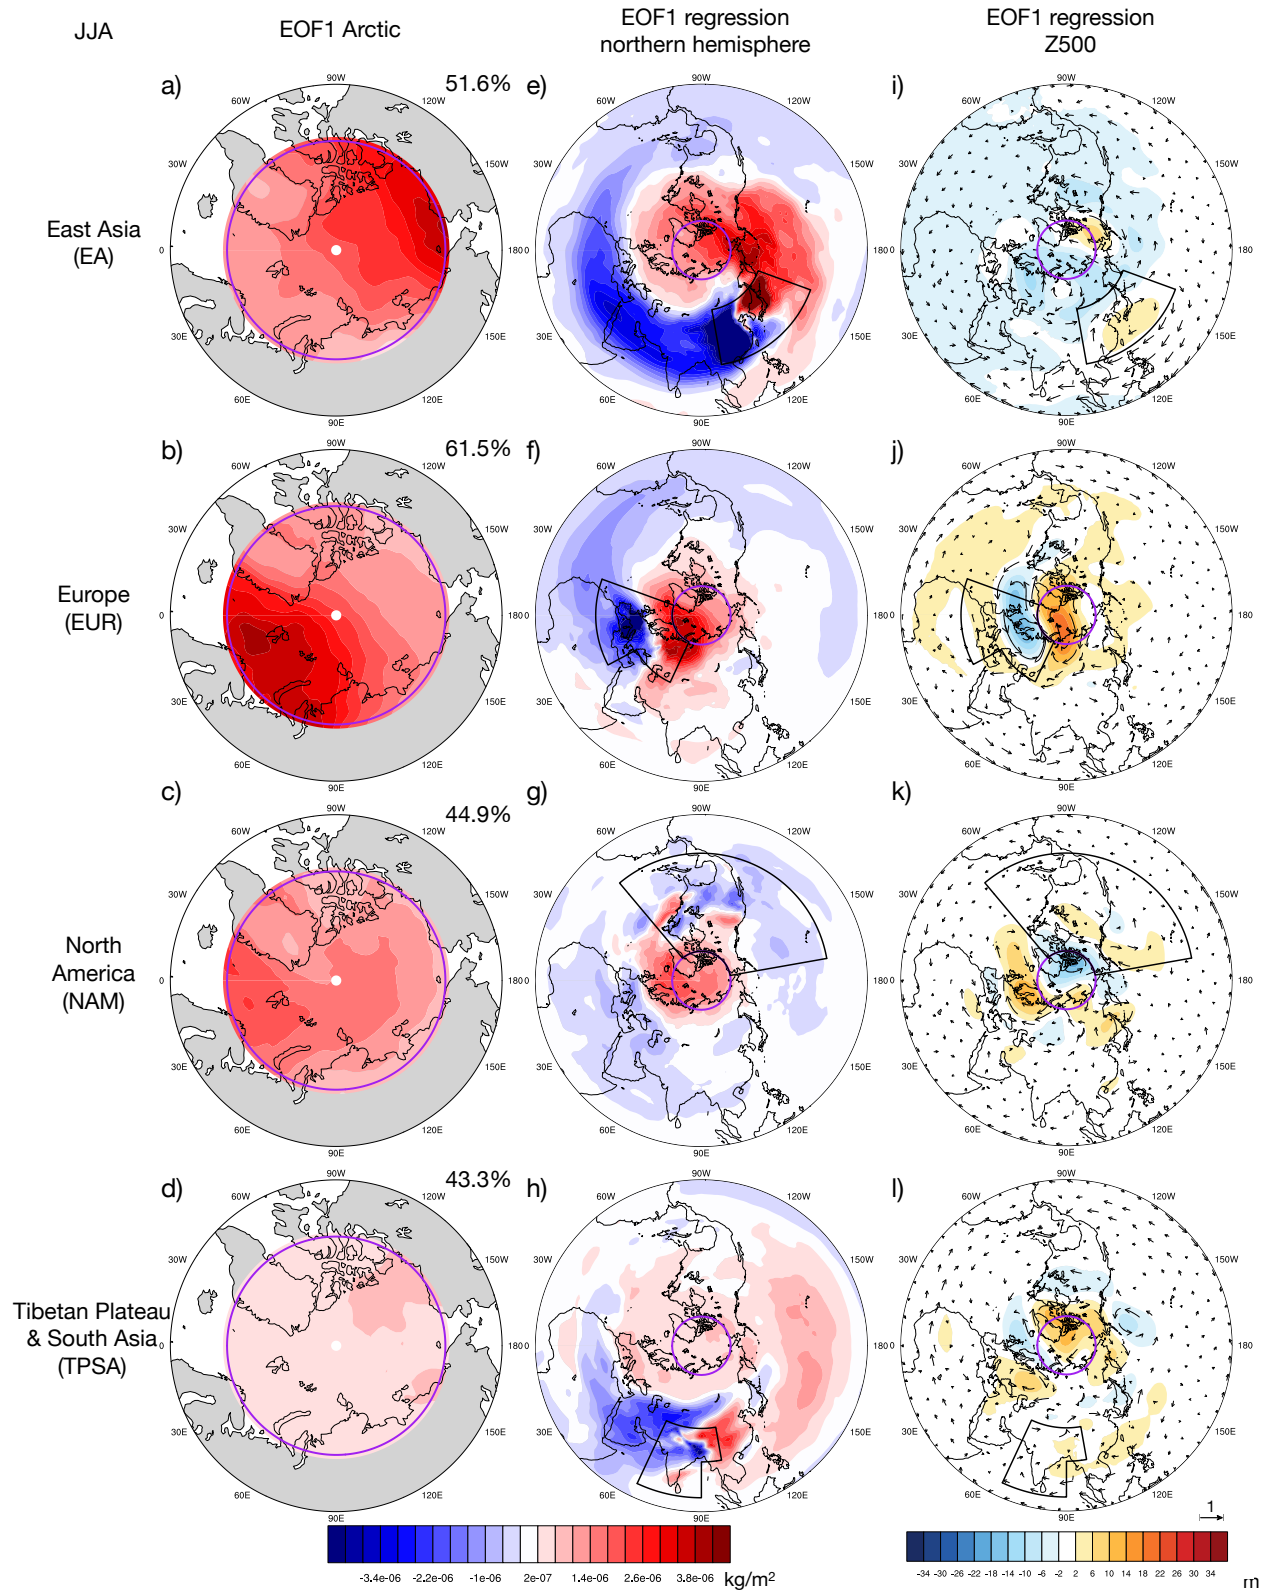

Figure S4: Similar to Fig. 7, but for summer (JJA).

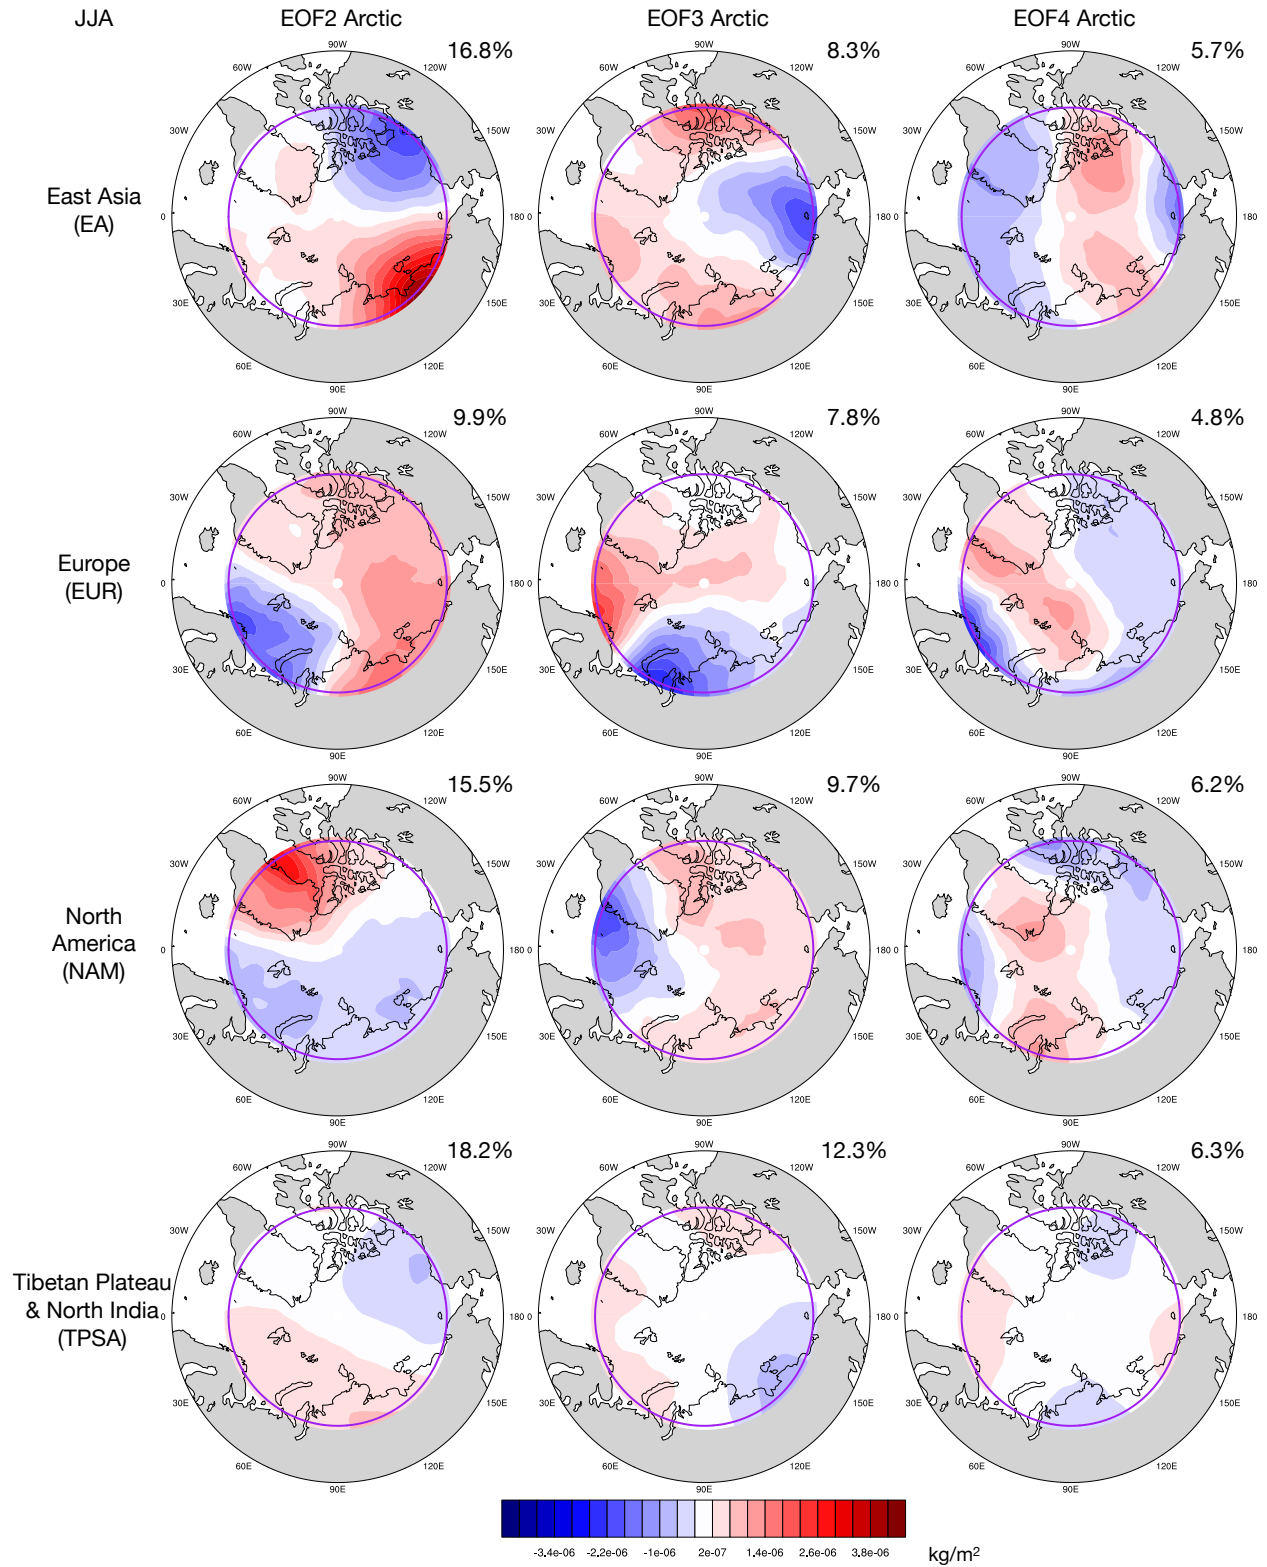

Figure S5: Similar to Fig. S2, but for summer.

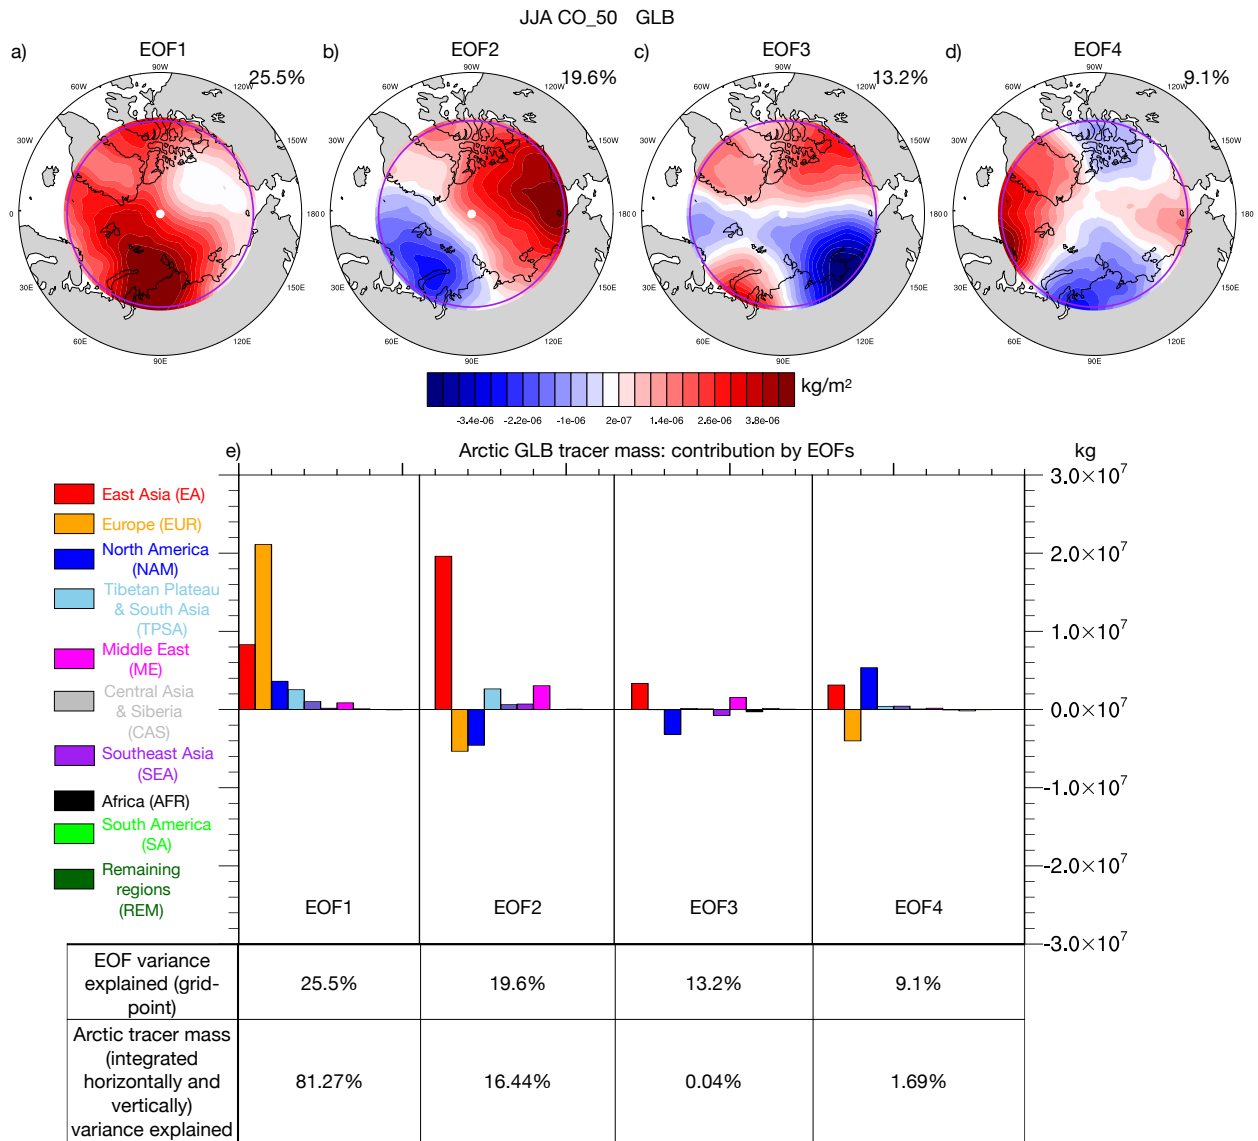

Figure S6: Similar to Fig. 8, but for summer (JJA).

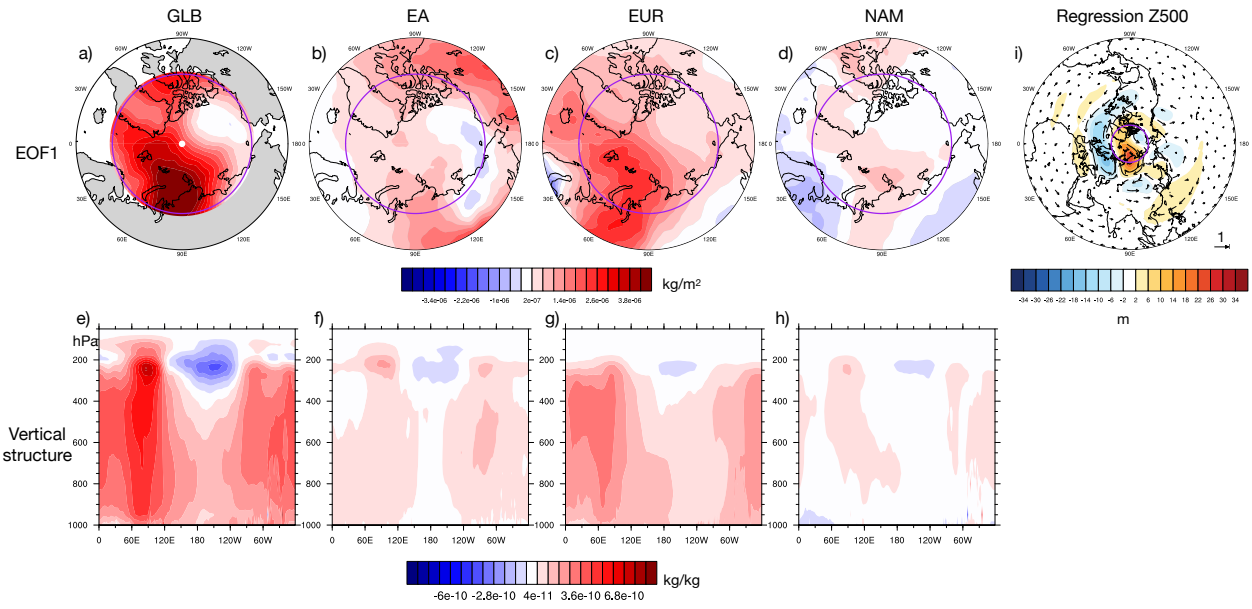

Figure S7: Similar to Fig. 10, but for summer EOF1.

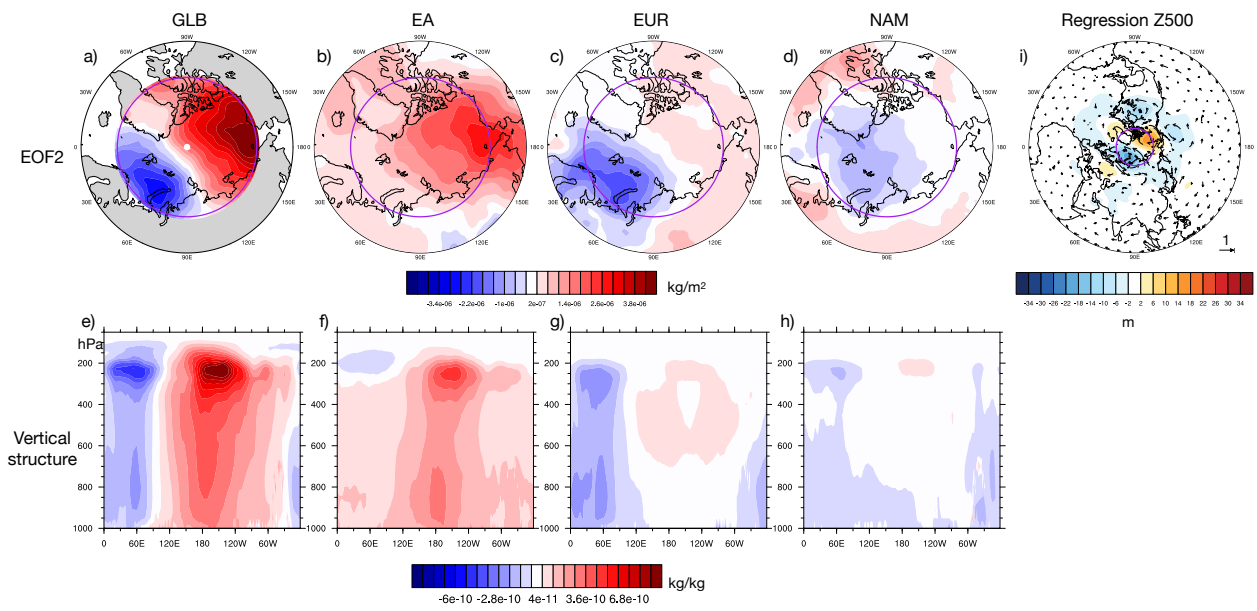

Figure S8: Similar to Fig. S4, but for summer EOF2.

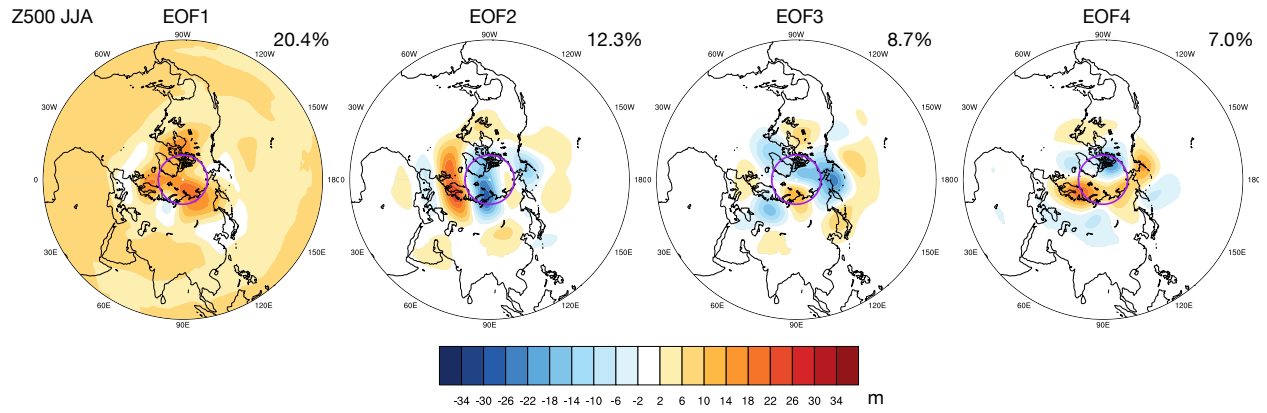

Figure S9: Similar to Fig. S3, but for summer.

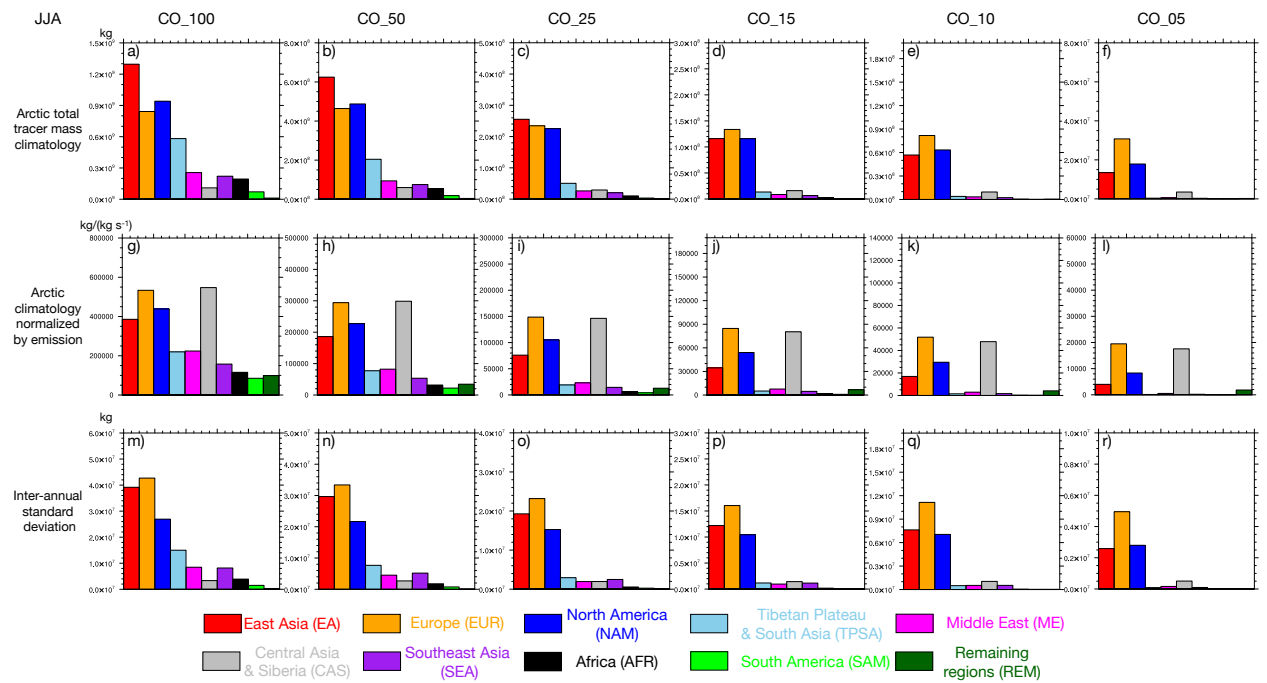

Figure S10: Similar to Fig. 12, but for summer.

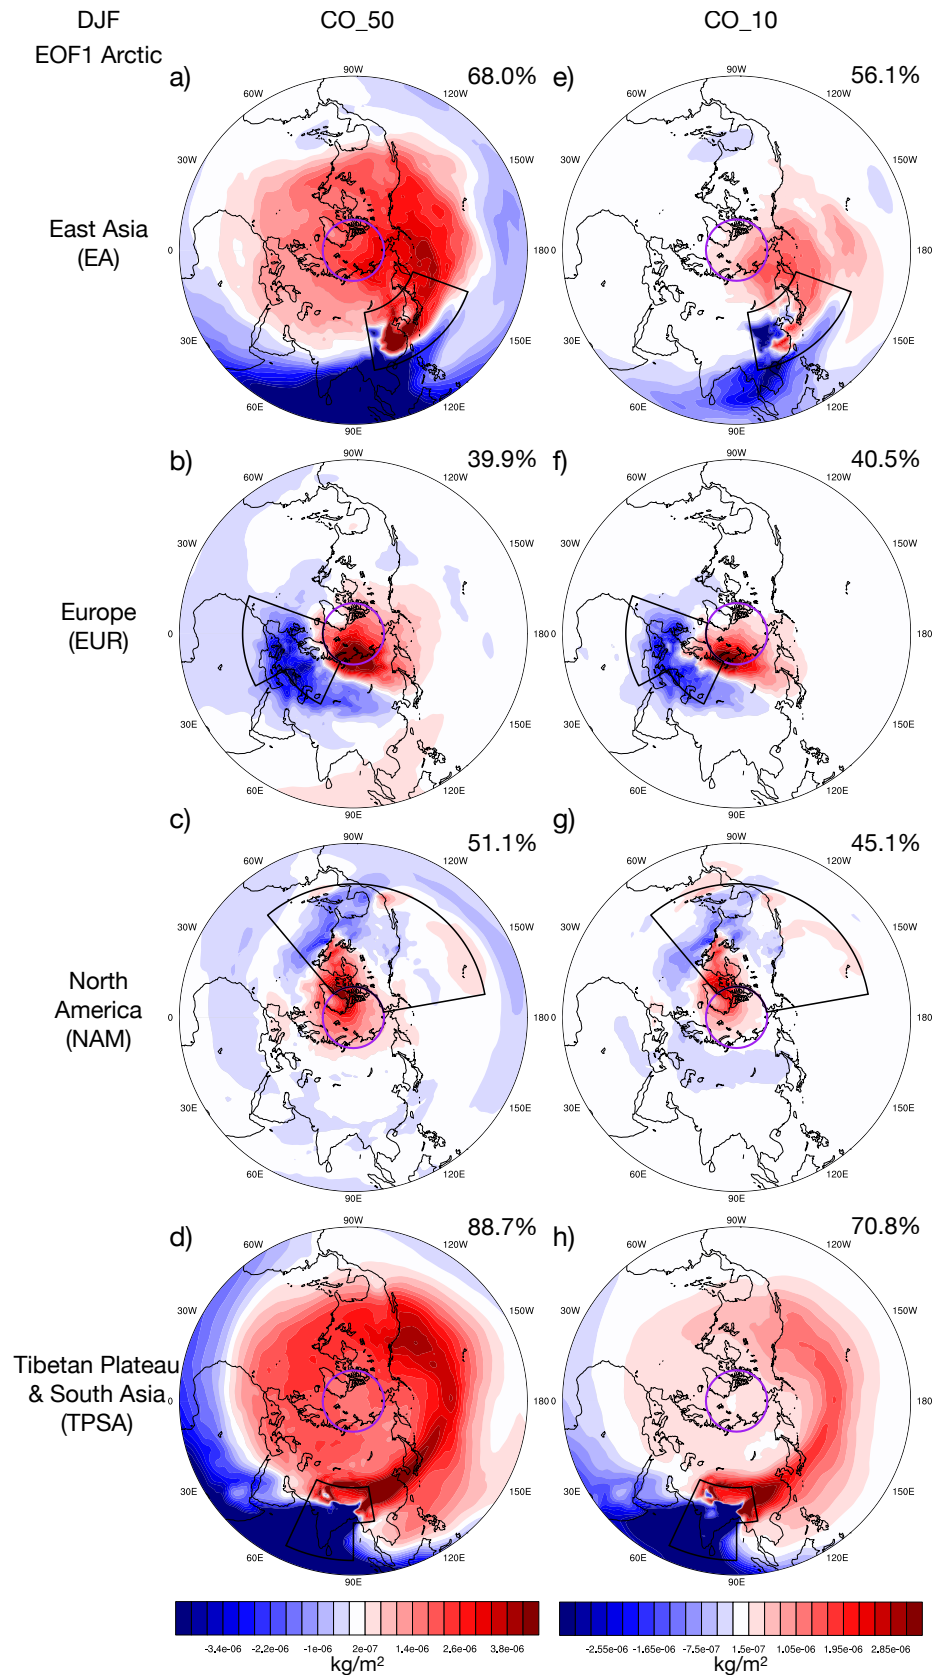

Figure S11: (a-d) The same as Fig. 7e-h. The spatial variance explained by EOF1 is shown in the top-right corner. (e-h) Similar to (a-d), but for CO10.
